# Supplementary material for: Appropriateness and Utility of a Clinical Decision Support System at the Digital Front Door
Source: Research Square preprint supplement (doi:10.21203/rs.3.rs-8157860/v1), 2026-01-08
Supplement: Supplementary file 1 [file 485a4299fe0d9c2a4e1db251.docx]

## Physician post-consultation Questionnaire

| Nr | New question |
| --- | --- |
| 1 | Years of clinical experience [ ]  *Including all work experience as a doctor after medical school. Please enter 1 if you have been working less than one year.* |
| 2 | - Age of the patient - Sex of the patient - Patient CUF ID - Study participant ID |
| 3 | How would you classify this clinical case?   - Easy - Moderate - Challenging |
| 4 | How much time did you spend on this consultation? |
| 5 | How soon after the symptom assessment did the consultation take place?   - Immediately - The same day - The next day - Within a week - 1 week–1 month - More than 1 month |
| 6 | Were the suggested conditions reasonable based on the patient's presentation?  *Given the presentation of the patient and whether they are applicable overall.*   - All of them are reasonable - Some of them are reasonable - None are reasonable   (optional) Please specify which conditions were not reasonable |
| 7 | Were the suggested conditions useful for your diagnostic workup?  *Consider whether the condition suggestions were actually useful, and opened up possible alternative conditions for this patient.*   - Very useful - Somewhat useful - Not useful at all |
| 8 | Was your most probable diagnosis included among the suggested conditions?  *This would include:*  *• an exact match*  *• an exact match but using an alternative name for the condition*  *• a more precise form of the suggested condition*  *• a condition within the same umbrella term*  *• a subtype related to the suggested condition (e.g. viral and bacterial conjunctivitis)*   - Yes - No |
| 9 | If possible, please provide the ICD10 code of the most probable diagnosis for this patient |
| 10 | After using Ada, did you save time on any of the following activities (please check all that apply)?   - Face-to-face/ virtual patient consultation - Reviewing tests/ planning next-steps for patients - Electronic Health Record input - Other (please specify) - Did not save time |
| 11 | Please indicate your level of agreement with the statements below  The Ada report provided you with additional useful information about the patient   - Strongly agree - Agree - Neither agree nor disagree - Disagree - Strongly disagree |
| 12 | The list of reported symptoms was complete   - Strongly agree - Agree - Neither agree nor disagree - Disagree - Strongly disagree |
| 15 | The report improved consultation efficiency   - Strongly agree - Agree - Neither agree nor disagree - Disagree - Strongly disagree |
| 16 | The report helped me feel more prepared for the consultation   - Strongly agree - Agree - Neither agree nor disagree - Disagree - Strongly disagree |
| 17 | Patients using Ada are more engaged during their consultation   - Strongly agree - Agree - Neither agree nor disagree - Disagree - Strongly disagree |
| 18 | Patients using Ada are better informed about their health   - Strongly agree - Agree - Neither agree nor disagree - Disagree - Strongly disagree |
| 19 | Based on the patient's symptoms, the advice level of the top-ranked suggested condition was reasonable   - Strongly agree - Agree - Neither agree nor disagree - Disagree - Strongly disagree |
| 20 | The advice levels of all suggested conditions were reasonable   - Strongly agree - Agree - Neither agree nor disagree - Disagree - Strongly disagree |
| 21 | The Ada report increased my confidence with my most probable diagnosis   - Strongly agree - Agree - Neither agree nor disagree - Disagree - Strongly disagree |
| 22 | The Ada report was NOT useful   - Strongly agree - Agree - Neither agree nor disagree - Disagree - Strongly disagree |
| 23 | (optional) Were any symptoms or medical history missing from the report that could've been relevant for the diagnosis? If yes, please specify. *Please write "n/a" if there were no symptoms missed by Ada.* |
| 24 | Did the patient present with the same symptoms/medical problems as they stated in the assessment?   - Yes - No   (optional) If no, what do you think is the most likely reason?   - The patient was not able to enter their symptoms in the assessment accurately - The patient’s symptoms changed since Ada’s assessment - The patient had multiple presenting complaints and only focused on one of them - Other:  *please specify* [ ] |
| 25 | Did the reports prompt you to order any tests that you would not otherwise have ordered?   - Yes - No - I don’t know |
| 26 | Did the Ada symptom report enable you to identify potential red flags and critical symptoms promptly during the medical consultations?   - Yes, the report was helpful in identifying potential red flags - No, the report was not helpful in identifying potential red flags - Not applicable |
| 28 | Based on the patient's most probable diagnosis, what care option would have been most reasonable?   - Self-care/ pharmacy - Teleconsultation - Routine doctor's consultation - Specialist consultation - Urgent primary care consultation - Emergency care |
| 30 | Optional: Do you have any additional comments or feedback regarding the Ada report? |

## Participants pre- and post assessment Questionnaire

| Nr | Questions |
| --- | --- |
| 1 | *Pre assessment question:*  Before we start, what are you considering doing about your symptoms?   - Managing my symptoms at home or consulting a pharmacist - Consulting a GP online or by phone - Consulting a specialist online or by phone - Consulting a GP in person - Consulting a specialist in person - Seeking emergency care - I’m not sure - Skip |
| 2 | *Post assessment question 1:*  What are you considering doing next?   - Managing my symptoms at home or consulting a pharmacist - Consulting a GP online or by phone - Consulting a specialist online or by phone - Consulting a GP in person - Consulting a specialist in person - Seeking emergency care - I’m not sur - Skip |
| 3 | *Post assessment question 2:* Were you able to enter all your symptoms?   - Yes - No - I’m not sure - Skip |
| 4 | *Post assessment question 3:* Did the assessment results make you less anxious?   - Yes - No - No difference - Skip |
| 5 | *Post assessment question 4:* Did the assessment help you prepare for a medical consultation?   - Yes - No - Doesn’t apply - Skip |
