# Supplementary material for: Appropriateness and Utility of a Clinical Decision Support System at the Digital Front Door
Source: Research Square preprint supplement (doi:10.21203/rs.3.rs-8157860/v1), 2026-01-08
Supplement: Supplementary file 2 [file a5e7aafb8ae2aa2c2ecac402.docx]

## Appendix Table 1A. Top urgency advice level Reasonability by Speciality

| Specialty | Strongly agree | Agree | Neither agree nor disagree | Disagree | Strongly Disagree | Total |
| --- | --- | --- | --- | --- | --- | --- |
| Dermatology | 6 | 1 | 1 | 2 | 0 | 10 |
| Gastroenterology | 11 | 4 | 5 | 3 | 0 | 23 |
| Gynaecology | 9 | 13 | 0 | 4 | 0 | 26 |
| Orthopaedics / Trauma | 9 | 4 | 1 | 5 | 1 | 20 |
| Otorhinolaryngology / Ear Nose Throat (ENT) | 15 | 20 | 4 | 6 | 2 | 47 |
| Pulmonology | 6 | 4 | 0 | 1 | 0 | 11 |
| Other (all specialties <10 cases) | 11 | 7 | 4 | 2 | 0 | 23 |
| Total | 66 | 53 | 15 | 23 | 3 | 161 |

##

## Appendix Table 1B. All urgency advice levels Reasonability by Speciality

| Specialty | Strongly agree | Agree | Neither agree nor disagree | Disagree | Strongly Disagree | Total |
| --- | --- | --- | --- | --- | --- | --- |
| Dermatology | 4 | 1 | 4 | 1 | 0 | 10 |
| Gastroenterology | 12 | 4 | 4 | 2 | 0 | 22 |
| Gynaecology | 11 | 12 | 1 | 2 | 0 | 26 |
| Orthopaedics / Trauma | 11 | 3 | 2 | 3 | 1 | 20 |
| Otorhinolaryngology / Ear Nose Throat (ENT) | 20 | 18 | 7 | 3 | 0 | 48 |
| Pulmonology | 8 | 3 | 0 | 0 | 0 | 11 |
| Other (all specialties <10 cases) | 12 | 6 | 4 | 2 | 0 | 24 |
| Total | 78 | 47 | 23 | 13 | 0 | 161 |

##

## Appendix Table 1C. Advice levels Reasonability by Sex and Age

| Group | Top urgency advice level reasonability (1=Strongly disagree → 5=Strongly agree) | All urgency advice levels reasonability (1=Strongly disagree → 5=Strongly agree) |
| --- | --- | --- |
| Female | 1: 2 · 2: 12 · 3: 7 · 4: 43 · 5: 32 | 1: 0 · 2: 6 · 3: 14 · 4: 50 · 5: 26 |
| Male | 1: 1 · 2: 11 · 3: 7 · 4: 23 · 5: 21 | 1: 1 · 2: 7 · 3: 8 · 4: 27 · 5: 20 |
| 18–64 | 1: 3 · 2: 22 · 3: 14 · 4: 64 · 5: 51 | 1: 1 · 2: 12 · 3: 22 · 4: 74 · 5: 44 |
| 65+ | 1: 0 · 2: 1 · 3: 1 · 4: 3 · 5: 2 | 1: 0 · 2: 1 · 3: 0 · 4: 4 · 5: 3 |

##

## Appendix Table 2A. Comparison of CDSS’s highest advice level with physician-recommended behaviour among cases rated not appropriate

| CDSS highest advice level | n cases | Aligned | Overcautious | Unsafe |
| --- | --- | --- | --- | --- |
| Self-care | 0 | – | – | – |
| Self-care with pharmacy support | 0 | – | – | – |
| Primary care in 2–3 weeks | 1 | 0 | 1 | 0 |
| Primary care in 2–3 days | 5 | 4 | 1 | 0 |
| Primary care on the same day | 5 | 3 | 2 | 0 |
| Primary care within 4 hours | 0 | – | – | – |
| Emergency care | 1 | 1 | 0 | 0 |
| Call ambulance | 2 | 1 | 1 | 0 |
| Total (n=14) | 14 | 9 (64.3%) | 5 (35.7%) | 0 (0.0%) |

Physician responses were mapped onto the same 8-level CDSS advice scale:

• “Managing symptoms at home or consulting a pharmacist” → Self-care / Self-care with pharmacy support
 • “Consulting a GP” or “Consulting a specialist” → Primary care (2–3 weeks, 2–3 days, same day, or within 4 h)
 • “Emergency Room / Emergency” → Emergency care / Call ambulance

##

## Appendix Table 3A. Most probable diagnosis was included among the suggested conditions per Speciality

| Case specialty | n/N | % included | 95 % CI % included |
| --- | --- | --- | --- |
| Dermatology | 4/10 | 40.0 | 12.2 – 73.8 |
| Gastroenterology | 18/23 | 78.3 | 56.3 – 92.5 |
| Gynaecology | 22/26 | 84.6 | 65.1 – 95.6 |
| Orthopaedics / Trauma | 18/20 | 90.0 | 68.3 – 98.8 |
| Otorhinolaryngology / Ear Nose Throat (ENT) | 39/47 | 83.0 | 68.6 – 92.9 |
| Pulmonology | 10/11 | 90.9 | 58.7 – 99.8 |
| Other | 20/26 | 76.9 | 56.4 – 91.0 |
| Total | 131/163 | 80.4 | 73.5 – 86.0 |

##

## Appendix Table 4A. Predictors of efficiency improvement

| Predictor | Category | n | Efficiency improved (n, %) | 95 % CI % |
| --- | --- | --- | --- | --- |
| Reasonableness of suggested conditions | All reasonable | 47 | 34 (72.3%) | 57.4 – 84.4 |
| Some reasonable | 10 | 6 (60.0%) | 26.2 – 87.8 |
| None reasonable | 3 | 0 (0.0%) | 0 – 70.8 |
| Usefulness of condition suggestions | Very useful | 28 | 28 (100%) | 87.9 – 100 |
| Somewhat useful | 23 | 12 (52.2%) | 30.6 – 73.2 |
| Not useful | 9 | 0 (0.0%) | 0 – 33.6 |

##

## Appendix Table 4B. Predictors of Physician preparedness

| Predictor | Category | n | Prepared (n, %) | 95 % CI % |
| --- | --- | --- | --- | --- |
| Reasonableness of suggested conditions | All reasonable | 47 | 35 (74.5%) | 59.7 – 86.1 |
| Some reasonable | 10 | 6 (60.0%) | 26.2 – 87.8 |
| None reasonable | 3 | 2 (66.7%) | 9.4 – 99.2 |
| Usefulness of condition suggestions | Very useful | 28 | 28 (100%) | 87.9 – 100 |
| Somewhat useful | 23 | 13 (56.5%) | 34.5 – 76.8 |
| Not useful | 9 | 2 (22.2%) | 2.8 – 60.0 |

##

## Appendix Table 5A. Participants post-assessment survey

| Outcome | Response | n | % | 95 % CI % |
| --- | --- | --- | --- | --- |
| Able to report all symptoms | yes | 1183 | 80.5 | 78.4 – 82.5 |
| unsure | 131 | 8.9 | 7.5 – 10.5 |
| skip | 95 | 6.5 | 5.3 – 7.9 |
| no | 61 | 4.1 | 3.2 – 5.3 |
| Feel less anxious | yes | 485 | 33.0 | 30.5 – 35.6 |
| no | 454 | 30.9 | 28.4 – 33.4 |
| no difference | 427 | 29.0 | 26.6 – 31.5 |
| skip | 104 | 7.1 | 5.8 – 8.5 |
| Prepared for consultation | yes | 1046 | 71.2 | 68.7 – 73.6 |
| skip | 272 | 18.5 | 16.6 – 20.6 |
| no | 152 | 10.3 | 8.8 – 12.0 |

## Appendix Table 5B. Participant predictors of preparedness and anxiety reduction

| Pair (X → Y) | n (X=No) | Y=yes | X=No (%) | 95% CI (X=No) | n (X=Yes) | Y=yes | X=Yes (%) | 95% CI (X=Yes) | Risk difference (pp) [95% CI] | Risk ratio [95% CI] |
| --- | --- | --- | --- | --- | --- | --- | --- | --- |
| Reported all symptoms → Felt less anxious | 190 | 21.6 | 16.3–28.0% | 1172 | 37.8 | 35.1–40.6% | +16.2 (9.7–22.7) | 1.75 (1.32–2.32) |
| Reported all symptoms → Felt prepared | 181 | 65.7 | 58.6–72.3% | 1148 | 80.4 | 78.0–82.6% | +14.7 (7.4–21.9) | 1.22 (1.10–1.36) |
| Felt prepared → Felt less anxious | 289 | 8.0 | 5.4–11.7% | 1039 | 43.9 | 40.9–46.9% | +35.9 (31.6–40.3) | 5.51 (3.70–8.21) |

## Appendix Table 5C. Anxiety reduction by change in intended care

| Category | n (of 1,338) | Less anxious n/N | Less anxious % | 95 % CI % | No difference % | Not less anxious % |
| --- | --- | --- | --- | --- | --- | --- |
| No change | 897 | 293/886 | 33.1 | 29.5 – 36.8 | 30.4 | 36.6 |
| Escalated * | 126 | 55/125 | 44.0 | 38.7 – 49.5 | 26.4 | 29.6 |
| De-escalated * | 110 | 52/108 | 48.1 | 43.2 – 53.0 | 30.6 | 21.3 |
| Made certain † | 138 | 53/137 | 38.7 | 30.8 – 47.1 | 38.0 | 23.4 |
| Made uncertain † | 37 | 9/37 | 24.3 | 17.1 – 33.1 | 40.5 | 35.1 |
| Stayed uncertain ‡ | 30 | 8/30 | 26.7 | 17.3 – 38.8 | 40.0 | 33.3 |

*Escalated = moved to a higher-urgency category; De-escalated = moved to a lower-urgency category.
 †Made certain = “I’m not sure” → specific category; Made uncertain = specific category → “I’m not sure.”
 ‡Stayed uncertain = “I’m not sure” at both timepoints

## 
